# Supplementary material for: Association between Dietary Patterns and Cognitive Function among Qatari Adults: A Cross-Sectional Analysis of the Qatar Biobank Study
Source: MDPI journal article supplement (doi:10.3390/nu15184053), 2023-09-19
Supplement: s1 [file s1]

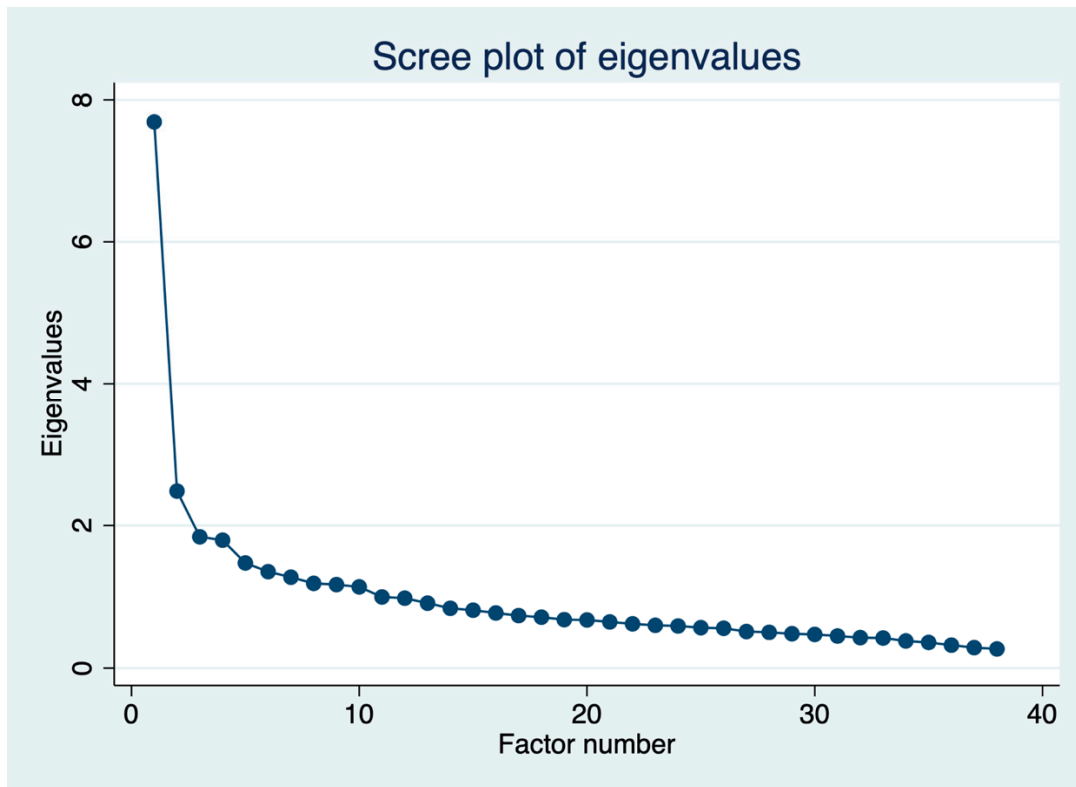

**Supplementary Figure S1:** Scree plot of eigenvalues of factors derived from factor analysis.

**Supplementary Table S1.** Food groups used in factor analysis.

| Food group                   | Food items included                                                                                                                                                                                                                                            |
|------------------------------|----------------------------------------------------------------------------------------------------------------------------------------------------------------------------------------------------------------------------------------------------------------|
| Coffee                       | Arabic coffee; instant coffee; other coffee (e.g. filter coffee, cappuccino)                                                                                                                                                                                   |
| Tea                          | Tea; herbal tea; karak                                                                                                                                                                                                                                         |
| Milk                         | Milk as a beverage (cold milk, cappuccino)                                                                                                                                                                                                                     |
| Milk added to cereal         | Milk added to cereal                                                                                                                                                                                                                                           |
| Milk shakes                  | Milk shakes or floured milk                                                                                                                                                                                                                                    |
| Yoghurt                      | Laban; yoghurt; labneh                                                                                                                                                                                                                                         |
| Cheese                       | Hard cheese (e.g. gouda, cheddar); white cheese (halloumi, cream cheese); processed cheese                                                                                                                                                                     |
| Butter                       | Butter                                                                                                                                                                                                                                                         |
| Breakfast Cereal             | Balaleet; cornflakes and other cold cereals; muesli, porridge; other brand cereals                                                                                                                                                                             |
| Arabic/Iranian bread         | Arabic bread (lavash); Iranian bread                                                                                                                                                                                                                           |
| White bread                  | Toast (sliced bread, white)                                                                                                                                                                                                                                    |
| Brown bread                  | Toast (sliced bread, brown)                                                                                                                                                                                                                                    |
| Other bread                  | Other breads                                                                                                                                                                                                                                                   |
| Croissant                    | Croissant                                                                                                                                                                                                                                                      |
| Zaatar fatayer               | Zaatar fatayer                                                                                                                                                                                                                                                 |
| Soups/starters               | Ready-made soup from powder; other soups; hummus, mutabbal, baba ghanush; other dips; tabbouleh; koussa mahshi (stuffed zucchini); eggplants fried or baked; moussaka; other vegetable starters; fish and seafood starters; chicken, meat, or sausage starters |
| Salad and raw vegetables     | Raw vegetables; green leafy salad (e.g. lettuce); mixed salad (e.g. with tomato, onion, cucumber, other vegetables); fattoush; bean salads (chickpeas, lentils); bulghur salad                                                                                 |
| Salad and cooked vegetables  | Vegetable stews; vegetable curries; other cooked vegetables; corn                                                                                                                                                                                              |
| Potato                       | Potato                                                                                                                                                                                                                                                         |
| White rice                   | White rice                                                                                                                                                                                                                                                     |
| Biryani                      | Biryani                                                                                                                                                                                                                                                        |
| Asian noodles                | Asian noodles                                                                                                                                                                                                                                                  |
| Lasagna                      | Lasagna                                                                                                                                                                                                                                                        |
| Red meat                     | Red meat                                                                                                                                                                                                                                                       |
| Chicken                      | Chicken                                                                                                                                                                                                                                                        |
| Fish                         | Fish                                                                                                                                                                                                                                                           |
| Chicken/meat fish mixed dish | Meat served with rice (mashboos); chicken with rice; harees; meat cooked with vegetables (margooga, saloona); chicken                                                                                                                                          |

|                              |                                                                                                                                                                                        |
|------------------------------|----------------------------------------------------------------------------------------------------------------------------------------------------------------------------------------|
|                              | cooked with vegetables (margooga, saloona); meat curry; chicken curry; kofta; meat kebab; chicken kebab; lamb chops, escalope; grilled chicken                                         |
| Grilled/fried/baked fish     | Grilled, fried or baked fish; fish cooked with vegetables; smoked fish                                                                                                                 |
| Eggs                         | Eggs (boiled, fried, scrambled, omelets)                                                                                                                                               |
| Fast food                    | Meat shawarma; chicken shawarma; falafel wrap; samosa; other Middle Eastern style fast foods; French fries; potato chips; burgers; hotdogs; pizza; fried chicken (e.g. wings, nuggets) |
| Fresh fruit                  | Fresh fruit; banana; watermelon                                                                                                                                                        |
| Canned/dried fruit and dates | Canned fruits; dried fruits; dates                                                                                                                                                     |
| Desserts                     | Traditional desserts (muhalabiyya, halwa, ageeli, elgaymat, khanfaroush); other Middle Eastern or Lebanese desserts; cookies; biscuits; muffins; cake; doughnuts                       |
| Chocolate                    | Chocolate                                                                                                                                                                              |
| Ice cream                    | Ice cream                                                                                                                                                                              |
| Nuts                         | Nuts                                                                                                                                                                                   |
| Fresh fruit juice            | Fresh fruit juices; smoothies                                                                                                                                                          |
| Soft drink                   | Preserved fruit juice (canned/bottled); soft drinks, sodas; diet soft drinks, sodas; energy drinks                                                                                     |

**Supplementary Table S2.** Subgroup analyses of the association between quartiles of modern dietary pattern scores and MRT.

|                                | Q1  | Q2                  | Q3                  | Q4                  | p for trend | p for interaction |
|--------------------------------|-----|---------------------|---------------------|---------------------|-------------|-------------------|
| Sex                            |     |                     |                     |                     |             | 0.534             |
| Male                           | 0.0 | -31.4 (-68.2,5.4)   | -7.3 (-45.8,31.2)   | -14.3 (-54.4,25.9)  | 0.860       |                   |
| Female                         | 0.0 | 10.3 (-42.2,62.8)   | 27.9 (-24.9,80.7)   | 25.2 (-29.3,79.8)   | 0.301       |                   |
| Age (years)                    |     |                     |                     |                     |             | 0.004             |
| <40                            | 0.0 | 7.2 (-29.1,43.4)    | 45.9 (10.8,81.0)    | 27.1 (-7.5,61.7)    | 0.044       |                   |
| 40+                            | 0.0 | -9.9 (-69.5,49.7)   | -43.2 (-111.3,24.8) | -34.5 (-118.4,49.3) | 0.221       |                   |
| Education                      |     |                     |                     |                     |             | 0.119             |
| Low (below university)         | 0.0 | -38.2 (-112.2,35.7) | -12.6 (-87.2,62.0)  | -11.6 (-82.7,59.4)  | 0.997       |                   |
| High (university or above)     | 0.0 | -2.5 (-34.7,29.6)   | 10.8 (-22.3,43.9)   | 2.2 (-34.0,38.4)    | 0.702       |                   |
| Smoking status                 |     |                     |                     |                     |             | 0.244             |
| Non-smokers                    | 0.0 | -5.8 (-47.2,35.6)   | 9.2 (-32.6,51.0)    | 8.6 (-35.5,52.8)    | 0.573       |                   |
| Smokers                        | 0.0 | -52.7 (-120.9,15.6) | -16.8 (-89.1,55.4)  | -55.0 (-126.8,16.9) | 0.294       |                   |
| Ex-smokers                     | 0.0 | 37.1 (-28.3,102.5)  | 53.2 (-14.9,121.4)  | 75.2 (5.0,145.4)    | 0.034       |                   |
| Leisure time physical activity |     |                     |                     |                     |             | 0.330             |
| No                             | 0.0 | 26.6 (-30.2,83.4)   | 29.0 (-26.9,85.0)   | 27.4 (-31.0,85.9)   | 0.353       |                   |
| Yes                            | 0.0 | -21.0 (-58.8,16.7)  | 1.7 (-37.4,40.8)    | -5.2 (-45.5,35.1)   | 0.889       |                   |
| BMI categories                 |     |                     |                     |                     |             | 0.055             |
| Normal                         | 0.0 | -35.8 (-89.7,18.1)  | -10.7 (-62.5,41.1)  | -2.9 (-56.0,50.2)   | 0.722       |                   |
| Overweight                     | 0.0 | 11.8 (-34.6,58.1)   | 48.1 (-1.5,97.8)    | 23.6 (-28.2,75.4)   | 0.179       |                   |
| Obese                          | 0.0 | -21.7 (-88.6,45.2)  | -24.9 (-93.9,44.1)  | -14.9 (-87.7,58.0)  | 0.671       |                   |
| HDL cholesterol                |     |                     |                     |                     |             | 0.964             |
| Tertile 1                      | 0.0 | -42.6 (-99.8,14.7)  | -11.6 (-71.8,48.6)  | -6.8 (-63.0,49.4)   | 0.848       |                   |
| Tertile 2                      | 0.0 | -28.1 (-83.2,26.9)  | 5.1 (-48.3,58.6)    | -2.6 (-60.4,55.2)   | 0.729       |                   |
| Tertile 3                      | 0.0 | 35.3 (-19.5,90.1)   | 33.4 (-24.2,90.9)   | -9.5 (-74.8,55.9)   | 0.934       |                   |
| LDL cholesterol                |     |                     |                     |                     |             | 0.323             |
| Tertile 1                      | 0.0 | -45.3 (-107.8,17.1) | -9.0 (-73.0,55.1)   | -31.0 (-93.2,31.2)  | 0.581       |                   |
| Tertile 2                      | 0.0 | -13.1 (-72.7,46.5)  | -2.3 (-60.3,55.7)   | 14.9 (-47.1,76.9)   | 0.569       |                   |
| Tertile 3                      | 0.0 | 29.8 (-17.2,76.9)   | 37.5 (-12.9,88.0)   | 19.4 (-35.5,74.4)   | 0.399       |                   |

|                                        | Q1  | Q2                    | Q3                   | Q4                    | p for trend | p for interaction |
|----------------------------------------|-----|-----------------------|----------------------|-----------------------|-------------|-------------------|
| HDL cholesterol                        |     |                       |                      |                       |             | 0.285             |
| Tertile 1                              | 0.0 | -35.5 (-91.5,20.4)    | -18.9 (-78.1,40.2)   | -18.9 (-79.6,41.9)    | 0.716       |                   |
| Tertile 2                              | 0.0 | -7.8 (-56.8,41.1)     | 15.7 (-36.9,68.4)    | 0.4 (-53.1,54.0)      | 0.804       |                   |
| Tertile 3                              | 0.0 | 23.8 (-37.4,85.1)     | 29.2 (-29.9,88.3)    | 27.5 (-34.8,89.9)     | 0.385       |                   |
| Diabetes                               |     |                       |                      |                       |             | <0.001            |
| No                                     | 0.0 | 9.0 (-21.9,39.9)      | 31.6 (-0.2,63.4)     | 23.0 (-9.9,55.9)      | 0.085       |                   |
| Yes                                    | 0.0 | -108.8 (-250.4,32.7)  | -126.9 (-278.4,24.6) | -174.1 (-333.1,-15.0) | 0.030       |                   |
| Hypertension                           |     |                       |                      |                       |             | 0.238             |
| No                                     | 0.0 | -12.7 (-43.1,17.7)    | 8.0 (-22.8,38.7)     | 3.2 (-28.7,35.1)      | 0.533       |                   |
| Yes                                    | 0.0 | 77.5 (-74.8,229.8)    | -23.4 (-200.7,154.0) | -12.3 (-196.6,172.1)  | 0.808       |                   |
| Insulin use                            |     |                       |                      |                       |             | 0.090             |
| No                                     | 0.0 | -5.7 (-37.9,26.5)     | 11.2 (-21.6,44.1)    | 5.5 (-28.6,39.6)      | 0.542       |                   |
| Yes                                    | 0.0 | -316.1 (-799.4,167.3) | 21.9 (-606.4,650.1)  | -229.5 (-677.1,218.0) | 0.350       |                   |
| Diabetes medication other than insulin |     |                       |                      |                       |             | 0.105             |
| No                                     | 0.0 | -4.5 (-35.8,26.8)     | 12.5 (-19.3,44.4)    | 4.7 (-28.1,37.4)      | 0.558       |                   |
| Yes                                    | 0.0 | -53.1 (-271.6,165.5)  | -64.9 (-330.1,200.4) | -70.3 (-392.6,252.1)  | 0.585       |                   |
| Hypertension medication use            |     |                       |                      |                       |             | 0.312             |
| No                                     | 0.0 | -12.8 (-42.9,17.2)    | 11.4 (-19.1,41.9)    | -1.8 (-33.6,29.9)     | 0.694       |                   |
| Yes                                    | 0.0 | 167.3 (-57.5,392.1)   | -46.7 (-314.6,221.2) | 113.3 (-167.3,394.0)  | 0.638       |                   |

Models adjusted for age, sex, education, smoking and physical activity. Stratification variables were not adjusted in the corresponding models.

**Supplementary Table S3.** Associations between intake of individual traditional pattern foods and mean reaction time.

|                                          | Q1  | Q2                     | Q3                     | Q4                      | p for trend  |
|------------------------------------------|-----|------------------------|------------------------|-------------------------|--------------|
| Fish                                     | 0.0 | -2.0 (-33.7,29.6)      | 5.0 (-25.1,35.0)       | 19.2 (-13.8,52.2)       | 0.254        |
| Fresh fruit                              | 0.0 | 18.5 (-13.0,50.0)      | 9.4 (-21.7,40.6)       | 18.5 (-14.1,51.2)       | 0.365        |
| Vegetables                               | 0.0 | -5.9 (-37.4,25.7)      | -1.2 (-32.9,30.5)      | 21.9 (-10.2,53.9)       | 0.180        |
| Soups/starters <sup>a</sup>              | 0.0 | 2.1 (-29.0,33.2)       | -7.0 (-38.3,24.2)      | <b>41.0 (9.7,72.3)</b>  | <b>0.027</b> |
| Canned/dried fruit                       | 0.0 | <b>36.2 (4.1,68.2)</b> | 25.2 (-6.6,56.9)       | 27.1 (-5.7,60.0)        | 0.179        |
| Fruit juice                              | 0.0 | 28.1 (-0.9,57.1)       | 12.2 (-19.2,43.6)      | 2.0 (-29.8,33.9)        | 0.885        |
| Mixed dish <sup>b</sup>                  | 0.0 | -2.1 (-33.0,28.8)      | -0.0 (-30.5,30.5)      | <b>58.4 (26.3,90.5)</b> | <b>0.001</b> |
| Red meat                                 | 0.0 | -0.2 (-25.7,25.3)      | 9.2 (-24.1,42.5)       | -                       | 0.579        |
| Traditional pastries/breads <sup>c</sup> | 0.0 | -15.5 (-46.1,15.2)     | 21.7 (-8.9,52.2)       | 16.8 (-16.0,49.5)       | 0.097        |
| Rice                                     | 0.0 | 24.0 (-6.1,54.2)       | <b>38.4 (7.3,69.4)</b> | <b>39.3 (8.5,70.1)</b>  | <b>0.006</b> |

Bold represents p<0.05.

Values are regression coefficients (95% CI) from linear regression.

Individual foods are traditional pattern foods with factor loadings  $\geq 0.3$ .

Models adjusted for age, sex, education, smoking and physical activity.

<sup>a</sup> Ready-made soup from powder; other soups; hummus, mutabbal, baba ghanush; other dips; tabbouleh; koussa mahshi (stuffed zucchini); eggplants fried or baked; moussaka; other vegetable starters; fish and seafood starters; chicken, meat, or sausage starters.

<sup>b</sup> Meat served with rice (mashboos); chicken with rice; harees; meat cooked with vegetables (margooga, saloona); chicken cooked with vegetables (margooga, saloona); meat curry; chicken curry; kofta; meat kebab; chicken kebab; lamb chops, escalope; grilled chicken.

<sup>c</sup> Zaatar fatayer; Arabic/Iranian bread.

**Supplementary Table S4.** Associations between quartiles of traditional dietary pattern scores and hypertension.

|         | Q1   | Q2                | Q3                | Q4                | p-value |
|---------|------|-------------------|-------------------|-------------------|---------|
| Model 1 | 1.00 | 1.34 (0.56, 3.17) | 2.26 (1.01, 5.05) | 1.96 (0.87, 4.42) | 0.059   |
| Model 2 | 1.00 | 1.56 (0.63, 3.86) | 2.48 (1.05, 5.82) | 2.41 (1.03, 5.66) | 0.026   |

Values are odds ratios from logistic regression.

Model 1 adjusted for age and sex.

Model 2 further adjusted for education, smoking and physical activity and BMI.
